# Supplementary material for: Observation Bias: The Impact of Demand Censoring on Newsvendor Level and Adjustment Behavior
Source: Atypon-hosted journal article supplement (doi:10.1287/mnsc.2013.1825), 2014-03-10
Supplement: observation_bias_data_description---final.docx [file observation_bias_data_description---final.docx]

DATA DESCRIPTION

OBSERVATION BIAS: THE IMPACT OF DEMAND CENSORING ON NEWSVENDOR LEVEL AND ADJUSTMENT BEHAVIOR

**Description of variables:**

**participant_id**: unique identifier for each subject participating in the experiment

**condition**: indicates the condition that the subject participated in

1: indicates HU; the high margin, uncensored condition

2: indicates LU; the low margin, uncensored condition

3: indicates HC; the high margin, censored condition

4: indicates LC; the low margin, censored condition

**order_t**: the subject’s order in period t, where t is in the closed interval 1 to 50

**demand_t**: the demand realization for period t, where t is in the closed interval 1 to 50

**mean_order**: the subject’s average order quantity over all 50 periods

**wi_stddev**: the standard deviation of the subject’s order quantities over all 50 periods

**expnormcost:** 1525.328 for all participants which is G(Q*) and G(q*); i.e., G(1270) and G(730), since G() is symmetric around the mean under the parameters used in the experiment.

**expoppcost**: calculated as /50

**expbehcost**: calculated as /50 – expnormcost

**explvlcost**: calculated as ***G***(mean_order) – expnormcost

**expadjcost**: calculated as /50 – ***G***(mean_order)

**Data exclusions:**

The following participants were excluded from the analysis:

- All participants that completed less than 50 trials were excluded. There were 30 such subjects. Their participant id’s were: 119, 129, 151, 162, 163, 166, 172, 183, 207, 224, 226, 228, 230, 232, 242, 246, 250, 254, 255, 268, 272, 282, 317, 355, 356, 385, 393, 397, 412, and 465
- Two participants were excluded because they experienced technical issues during the experiment resulting in their inability to play the game. Their participant id’s were: 389 and 409.
- Four participants were excluded because there was strong evidence suggesting that they had acquired demand information. Their participant id’s were: 111, 148, 213, and 364
- Five participants were excluded due to severe over-ordering (four had orders in excess of 5000, and one had an average order quantity 8.5 standard deviations greater than the condition average). Their participant id’s were: 173, 208, 261, 271, and 427

**Data cleaning:**

We corrected order quantities in three instances in which a mistyping was obvious.

- Participant 342: Order_20 was changed from 10 to 1000.
- Participant 386: Order_24 was changed from 7560 to 756.
- Participant 461: Order_50 was changed from 12 to 1200.
