# Supplementary material for: Observation Bias: The Impact of Demand Censoring on Newsvendor Level and Adjustment Behavior
Source: Atypon-hosted journal article supplement (doi:10.1287/mnsc.2013.1825), 2014-03-10
Supplement: observation_bias_raw_data---excel---final.xlsx [file observation_bias_raw_data---excel---final.xlsx]

## Sheet: Data
participant_id	condition	mean_order	wi_stddev	expnormcost	expoppcost	expbehcost	explvlcost	expadjcost	order_1	order_2	order_3	order_4	order_5	order_6	order_7	order_8	order_9	order_10	order_11	order_12	order_13	order_14	order_15	order_16	order_17	order_18	order_19	order_20	order_21	order_22	order_23	order_24	order_25	order_26	order_27	order_28	order_29	order_30	order_31	order_32	order_33	order_34	order_35	order_36	order_37	order_38	order_39	order_40	order_41
99	1	1090.7	292.62	1525.33	2151.22	625.893	166.514	459.38	1150	750	900	1450	1500	1250	900	750	1250	1460	1270	650	1560	1280	1000	570	980	1390	780	590	1100	1460	890	680	780	1480	1160	1160	1470	1070	960	890	560	1055	690	1370	1100	1270	800	1450	1270
101	1	1302	192.714	1525.33	1694.93	169.6	4.85219	164.747	1750	1500	1000	1600	1400	1600	1200	1200	1200	1300	1500	1000	700	1000	1500	1200	1200	1600	1200	1200	1000	1300	1300	1300	1300	900	1400	1300	1300	1400	1600	1300	1200	1300	1200	1300	1350	1300	1200	1350	1300
105	1	920.08	219.417	1525.33	2461.9	936.571	667.45	269.121	1000	750	600	1200	1200	1000	750	750	600	750	900	750	750	750	750	750	600	750	1000	1000	750	800	750	900	750	750	804	750	750	750	1400	1200	1200	1200	750	1000	1100	1150	750	1000	1000
115	1	1071	210.706	1525.33	1977.58	452.245	206.682	245.563	600	500	700	1000	1100	800	700	1000	1300	1300	1300	1000	1300	1300	1000	1000	1300	1300	1000	1000	1000	1300	1000	1000	1000	1300	650	1300	1300	1300	1300	1000	1000	1300	1000	1300	900	1000	1000	1150	800
118	1	1050	147.773	1525.33	1900.94	375.605	254.536	121.069	1000	800	1200	1000	1000	1100	900	1000	1100	1200	900	1000	1200	800	900	1000	1400	1500	1000	1000	1200	1300	1000	1000	1000	1200	1000	1200	1200	1000	1200	1000	900	1000	1100	1200	700	1000	1000	1000	900
120	1	1466.2	71.1678	1525.33	1705.88	180.548	162.182	18.3663	1500	1450	1450	1500	1500	1450	1450	1450	1450	1500	1200	1200	1500	1500	1500	1500	1500	1500	1450	1500	1500	1450	1450	1450	1450	1500	1450	1500	1500	1500	1500	1500	1500	1450	1200	1500	1500	1500	1500	1500	1500
131	1	1029	208.025	1525.33	2073.21	547.881	307.625	240.256	950	500	900	1200	1200	1100	700	600	1100	1400	1100	700	1200	1050	1000	700	1000	1100	800	600	1050	1100	700	1000	1000	1200	900	1150	1200	1000	1300	1100	600	1000	1200	1000	1100	1150	1200	1200	1000
134	1	1144	138.741	1525.33	1708.36	183.031	80.359	102.672	1000	400	1000	1000	1000	1000	1000	1000	1000	1000	1000	1100	1100	1200	1200	1200	1200	1200	1200	1200	1200	1200	1200	1200	1200	1200	1200	1200	1200	1200	1200	1200	1200	1200	1200	1200	1200	1200	1200	1200	1200
137	1	1162.28	374.151	1525.33	2295.59	770.261	58.2195	712.041	1500	500	1000	1500	1250	750	500	530	1400	1300	1200	600	1600	1000	1100	800	1450	1624	550	1200	1500	1600	1400	1000	1100	1400	675	1435	1400	900	1600	900	600	1600	1165	1700	1045	1234	900	1400	1342
138	1	1186.8	80.5451	1525.33	1595.09	69.7561	34.293	35.4632	1200	740	1400	1200	1200	1200	1200	1200	1200	1250	1200	1000	1200	1200	1200	1200	1200	1200	1200	1200	1200	1200	1200	1200	1200	1250	1200	1100	1100	1100	1200	1200	1200	1200	1200	1200	1200	1200	1200	1200	1200
144	1	1001.16	268.647	1525.33	2299.02	773.686	386.123	387.563	1000	1000	1200	1200	1500	900	700	500	1000	1300	1350	750	1500	1300	600	400	669	1000	699	600	900	900	1000	800	1300	1600	990	990	780	900	1250	900	1100	1100	500	900	1100	1200	700	1200	900
155	1	1329.16	274.835	1525.33	1862.99	337.665	16.2219	321.443	1120	520	980	1400	1600	1350	940	860	1380	1550	1480	700	1670	1480	1420	1370	1480	1489	1290	1100	1370	1490	1269	1090	1100	1480	1250	1190	1900	1400	1680	1370	1100	1380	1200	1550	1370	1560	1380	1460	1120
158	1	1048.38	290.261	1525.33	2242.15	716.817	258.445	458.372	900	500	700	1400	1000	1003	750	630	1200	1300	1200	700	1300	1000	800	606	1300	1250	900	600	1200	1400	900	600	800	1400	740	1200	1500	700	1500	1000	590	1300	750	1200	1200	1000	1200	1500	1200
159	1	986	312.338	1525.33	2474.43	949.104	432.768	516.336	700	500	1000	1500	1200	700	500	500	1200	1600	1000	600	1000	1000	700	500	1200	1200	500	1000	1300	1000	500	800	1000	1000	500	1300	1500	800	1500	1000	500	1500	1000	1000	700	1000	1000	1200	800
168	1	986	204.051	1525.33	2192.68	667.349	432.768	234.581	800	600	950	1300	1100	900	800	700	1200	1200	1050	700	1300	1000	900	700	1300	1000	800	700	1300	900	800	800	1000	1300	900	1250	1300	600	900	1000	1200	1250	800	1200	900	900	900	1100	900
171	1	954	452.3	1525.33	3097.32	1571.99	540.243	1031.74	1550	400	1250	1700	1400	950	400	700	1200	1700	1000	300	1000	1700	500	600	1250	1550	400	700	1400	1200	450	900	1400	900	400	400	1550	500	1000	450	300	1700	1000	900	500	1000	500	1500	600
176	1	1169	235.366	1525.33	1868.7	343.373	51.0101	292.363	1200	700	1000	1400	1400	1200	1000	800	1200	1400	1450	800	1400	1400	1000	800	1000	1400	1000	800	1000	1400	1200	1000	1000	1200	1000	1200	1400	1200	1400	1000	500	1000	1000	1400	1400	1400	1000	1400	1200
178	1	1011.4	282.099	1525.33	2311.3	785.974	356.173	429.802	1100	750	1400	1500	1000	700	600	1400	1500	1400	600	1200	1400	1000	800	900	1200	750	500	500	900	1250	600	700	1300	1000	1000	1000	1000	1000	1050	400	1200	550	900	1200	1220	900	1200	1200	800
179	1	1418.6	222.045	1525.33	1848.38	323.051	96.2106	226.841	1400	458	640	1500	1500	1500	1232	1500	1500	1500	1500	1000	1500	1500	1500	1500	1500	1500	1500	1200	1000	1500	1500	1500	1000	1500	1500	1500	1500	1500	1500	1500	1500	1500	1500	1500	1500	1500	1500	1500	1500
180	1	1047.88	385.074	1525.33	2527.25	1001.92	259.657	742.26	1100	500	900	1250	1500	1000	700	600	1100	1660	1440	550	550	1250	944	430	880	1300	750	500	1100	1400	950	600	720	1600	850	1000	2000	1200	1400	1000	270	1300	450	1600	1300	1100	750	1400	1200
184	1	943.6	254.685	1525.33	2452.68	927.35	577.799	349.551	550	430	1500	1500	1200	1200	650	650	1100	1300	1300	550	1200	950	950	800	1000	1000	700	500	1000	1200	900	1000	1000	900	750	750	700	800	800	850	500	1000	1000	1000	700	1300	700	1000	1200
204	1	1079.86	301.561	1525.33	2197.28	671.954	188.053	483.901	1250	500	800	1667	1350	950	650	570	1100	1300	1350	600	1600	1150	900	500	1000	1300	800	700	1000	1400	1000	753	853	1400	800	1250	1000	850	1400	1000	700	1350	700	1300	1200	1300	1000	1300	1250
206	1	1064.2	298.774	1525.33	2215	689.671	221.607	468.064	800	750	760	800	900	850	700	500	1100	1000	1000	600	1000	900	850	600	900	1300	1100	1000	950	1400	700	1300	1300	900	800	1400	1500	750	1500	1300	800	1500	1000	1400	1000	1000	1000	1500	1200
211	1	1102	126.958	1525.33	1760.71	235.38	145.519	89.8614	1000	1000	1000	1200	1200	1000	1000	1000	1200	1300	1200	800	1300	1000	1000	1000	1000	1200	1000	1000	1000	1200	1000	1000	1200	1200	1000	1300	1300	1000	1200	1000	1000	1300	1000	1200	1000	1200	1000	1200	1000
214	1	935.24	294.22	1525.33	2593.18	1067.85	608.917	458.932	670	400	560	970	1000	850	600	530	880	1300	1050	652	1500	970	670	430	980	1300	530	350	1000	1250	750	500	740	1350	1000	1200	1500	970	1000	870	900	1000	1000	1200	1250	1270	800	1100	980
215	1	934.6	305.689	1525.33	2626.42	1101.09	611.333	489.761	1200	500	850	1200	1200	1000	800	800	1100	1300	1200	900	1600	1000	500	500	900	1100	600	500	1000	1100	700	500	600	1000	600	700	1700	600	990	800	400	1000	500	1200	1000	990	800	1100	1000
218	1	1192	244.816	1525.33	1862.94	337.613	30.0542	307.559	1100	1000	1000	1000	1400	1100	1200	1200	1200	1200	1200	1200	1500	1300	1200	1200	1200	1200	1200	1400	1200	1200	900	1000	1400	1500	600	900	1500	1500	1500	1200	600	1500	600	1500	1500	800	1000	1500	1200
235	1	1011	354.891	1525.33	2535.44	1010.11	357.319	652.79	1750	400	1000	1250	1250	1400	1250	750	950	1500	1250	400	400	1200	1000	550	1000	1400	500	500	1000	1400	750	1200	1000	1200	900	400	1500	750	1500	1000	500	1300	500	1000	500	1000	800	1200	1400
244	1	1166.8	419.326	1525.33	2409.94	884.607	53.3157	831.292	1400	500	560	150	1500	1200	1200	700	1200	1800	2000	780	1500	1800	1200	650	1000	1500	900	600	1000	1600	1000	700	800	1700	1000	1100	1800	900	1500	1200	500	1300	600	1600	1500	1500	900	1500	1200
249	1	1161.08	378.982	1525.33	2299.45	774.118	59.5591	714.559	1625	400	1000	1626	1400	1000	700	600	1250	1689	1400	600	1625	1300	940	500	1000	1500	700	600	940	1399	969	650	790	1300	1000	1250	1490	1250	1750	1250	400	1300	800	1625	1625	1400	1000	1459	1250
252	1	1154.06	187.806	1525.33	1767.58	242.251	67.7152	174.535	1100	1000	1000	1500	1250	1000	1001	1001	1100	1550	1500	1000	1200	1200	1100	1000	1000	1100	1000	1000	1000	1300	1000	1000	1000	1200	1000	1100	1500	1000	1100	1000	900	1200	1001	1200	1300	1300	1000	1200	1100
262	1	1176.8	246.804	1525.33	1873.16	347.833	43.2616	304.571	1200	1000	1500	1150	1100	1000	1000	1000	1700	1500	1200	700	1500	1200	1000	600	1200	1500	1000	1200	1200	1400	1000	1000	1000	1500	1200	1300	1600	1300	1200	990	500	1500	1000	1200	1200	1150	1000	1350	900
265	1	851.2	305.618	1525.33	2962.52	1437.19	966.985	470.21	400	300	500	1000	1150	900	500	530	800	1050	1250	500	1300	1100	650	400	550	950	550	500	750	1050	750	550	600	950	800	850	1300	950	1000	850	250	950	400	1300	1050	1100	500	1100	950
281	1	1014.8	245.849	1525.33	2175.9	650.571	346.506	304.065	1000	500	740	1200	1300	950	750	650	1000	1400	1300	700	2000	1200	900	1000	1100	1050	800	1000	950	1000	1200	800	800	1300	700	1000	1100	600	1000	950	900	1000	600	1000	1100	1100	900	1200	1100
285	1	816.8	250.977	1525.33	2984.56	1459.23	1136.6	322.637	700	390	450	700	600	950	500	400	600	1250	900	700	1300	800	600	700	1100	1000	500	800	1200	900	650	800	900	900	800	750	1100	500	900	750	650	1200	800	700	750	900	450	1200	950
286	1	1305	211.228	1525.33	1741.19	215.865	5.78814	210.076	1300	1000	1100	1500	1400	1350	1000	900	1200	1600	1450	700	1600	1300	1200	700	1300	1600	1100	1000	1200	1500	1200	1000	1100	1600	1200	1400	1500	1300	1350	1300	1300	1400	1400	1450	1400	1400	1350	1400	1350
294	1	918.02	307.022	1525.33	2696.52	1171.19	675.612	495.577	1250	300	500	1000	1100	1000	500	600	1100	1500	1300	600	1500	1000	700	500	1000	1200	700	600	1011	1531	1098	600	811	1100	600	700	1500	600	1000	500	500	1100	700	1200	1000	1000	600	1100	1000
301	1	808.84	255.3	1525.33	3024.67	1499.34	1177.68	321.66	900	380	570	850	1200	850	547	530	900	1200	1295	500	890	900	700	250	650	900	700	500	800	1100	780	400	500	1000	700	780	1300	890	1240	800	400	800	500	1000	980	900	560	800	850
308	1	1088	178.589	1525.33	1869.13	343.804	171.75	172.054	700	700	700	600	1500	1200	1000	1000	1000	1500	1300	1000	1500	1200	1250	1250	1250	1250	1200	1200	1100	1100	1000	1000	1000	1000	950	1000	1250	1000	1100	1000	1000	1100	1000	1000	1100	1100	1100	1100	1100
312	1	975	315.784	1525.33	2524.38	999.053	468.334	530.72	500	400	800	1200	1100	650	700	700	1150	1400	1000	550	1200	900	400	1000	1300	1500	900	900	1200	1400	600	1200	1000	1400	500	1000	1400	700	1550	800	550	1550	800	900	1100	1100	900	1350	700
332	1	1052.86	416.416	1525.33	2645.04	1119.71	247.711	871.995	1000	500	650	1500	1259	1078	1123	334	1876	1234	445	657	1200	1456	1600	550	1098	567	769	1276	1349	469	469	1500	765	499	1001	843	1732	1163	1492	630	369	1281	999	1729	1628	1283	888	666	1111
337	1	1188	158.616	1525.33	1686.68	161.349	33.2891	128.06	1600	1200	1200	1400	1200	1200	1000	1000	1000	1200	1400	1400	1400	1200	1200	700	900	1200	1200	1200	1000	1200	1200	1000	1000	1300	1100	1200	1000	1200	1500	1400	1200	1400	1300	1300	1100	1300	1200	1000	1200
341	1	1116	399.162	1525.33	2427.05	901.724	121.558	780.166	600	400	700	1000	1200	800	800	700	1200	1700	1700	700	1700	1300	1000	500	1000	1300	800	600	900	1400	1000	800	900	1700	1200	1200	1900	1200	1500	1100	300	1000	600	1700	1500	1400	800	1500	1300
342	1	871.26	353.405	1525.33	3027.38	1502.05	874.149	627.9	820	600	800	1000	850	1093	300	900	950	1000	1050	450	1200	950	800	400	1400	400	1000	1000	1300	1250	1000	800	500	1500	400	700	800	800	1100	1300	400	700	500	800	1000	1400	250	1600	500
353	1	1006.2	341.616	1525.33	2494.94	969.606	371.225	598.381	1700	500	800	1750	1400	900	700	600	1400	1700	1300	600	900	1000	730	500	1000	1300	600	500	1000	1200	700	650	876	1254	700	1000	1700	1200	1700	800	700	1200	900	1000	1000	1000	850	1000	900
357	1	1312	195.5	1525.33	1687.65	162.318	8.28442	154.033	1300	1300	1300	1300	1300	1300	1300	1300	1300	1500	1000	1000	1000	1300	1000	1300	1500	1500	1300	1300	1500	1300	1300	1300	1300	1300	1000	1500	1500	1000	1300	1000	1000	1500	1000	1300	1300	1500	1300	1600	1300
369	1	1006.08	311.343	1525.33	2411.75	886.423	371.576	514.847	500	400	600	1000	1500	1500	1000	900	1000	1300	1456	600	1500	1000	1400	900	700	1100	800	800	1000	1200	1200	900	500	500	956	999	1200	1000	1200	900	600	1200	600	1200	1111	1200	856	555	1200
374	1	1051.28	322.461	1525.33	2323.15	797.818	251.47	546.349	1400	530	630	1230	1400	1000	750	800	1300	1200	1075	640	1500	1075	759	690	1200	1400	640	735	1000	1350	950	600	790	1300	620	1100	1400	1400	100	1200	1000	600	1500	1000	1300	1500	750	1400	1200
382	1	1169	195.587	1525.33	1776.94	251.609	51.0101	200.599	1000	500	500	1250	1250	1100	1000	1000	1250	1250	950	900	1500	1400	1000	750	1500	1500	1200	1200	1200	1250	1250	1250	1200	1200	1200	1200	1500	1200	1200	1200	1200	1200	1200	1200	1200	1200	1200	1200	1200
390	1	1369	174.64	1525.33	1692.93	167.605	44.1841	123.421	1500	1000	1250	1500	1400	1300	1300	1000	1300	1400	1400	1000	1500	1300	1300	1000	1500	1500	1300	1300	1400	1600	1300	1200	1200	1500	1300	1300	1600	1300	1500	1300	1000	1500	1300	1300	1300	1700	1500	1500	1500
391	1	1200	162.882	1525.33	1692.55	167.222	24.0955	143.127	1250	750	750	1000	1000	1200	1200	750	1000	1200	1000	1200	1200	800	1200	1200	1200	1500	1200	1000	1200	1200	1200	1200	1200	1200	1300	1300	1300	1300	1300	1300	1300	1300	1300	1300	1300	1300	1300	1300	1300
395	1	987.7	246.162	1525.33	2274.49	749.159	427.4	321.759	1200	1150	1050	1230	1500	1023	450	600	1240	1400	870	600	523	1000	1550	1550	1000	1200	1100	1050	1067	600	500	1070	1100	1000	669	669	1040	577	807	1000	1000	1000	1000	1000	1000	1000	1000	1000	1000
399	1	998.4	254.786	1525.33	2269.39	744.063	394.41	349.653	1000	340	800	1250	1400	1000	850	600	900	1300	850	600	1300	1000	900	450	1400	1300	850	1100	800	1000	800	600	750	1300	900	980	1500	1000	1200	1000	600	800	950	1200	1100	1150	900	1100	1050
401	1	974	462.385	1525.33	3036.52	1511.19	471.639	1039.55	400	700	1200	1600	1800	800	1000	800	1000	1400	1000	300	1500	800	1000	1500	800	1000	1500	300	600	1000	900	400	500	1400	600	800	1700	800	800	1000	100	100	100	1200	1400	1300	500	1500	900
402	1	1021.78	341.443	1525.33	2468.57	943.242	327.093	616.149	400	400	700	1500	1400	1000	700	550	1000	1400	1350	700	1500	1200	900	500	900	1200	800	500	900	1300	1000	800	700	1500	800	900	1500	1200	1390	1000	400	1000	1000	1500	1200	1200	800	1399	1000
404	1	1092.6	279.51	1525.33	2103.76	578.434	162.88	415.555	1080	1100	1000	1300	1250	970	650	530	800	1500	1300	700	1500	1150	780	700	980	1150	1000	850	1150	1250	900	760	750	1400	800	950	1600	1050	1350	1300	850	1200	800	750	880	900	1200	1500	1300
405	1	899.44	276.58	1525.33	2669.66	1144.33	751.472	392.86	450	380	600	1000	1200	700	550	800	1000	1200	512	700	900	1200	400	900	1100	1500	580	800	800	1000	1000	800	800	1200	900	900	1500	900	1200	800	300	1000	800	1200	1000	1000	400	1000	1000
408	1	977.98	351.427	1525.33	2613.91	1088.58	458.556	630.024	1050	300	700	1700	1000	1000	700	600	1200	1500	1000	500	1700	1000	700	500	1200	1350	600	700	1200	1200	700	700	1000	1200	600	1200	1600	700	1200	100	1000	1000	599	1200	1000	1200	700	1300	1200
410	1	977.9	332.79	1525.33	2564.07	1038.74	458.817	579.924	400	600	650	1500	1100	850	500	520	1250	1550	1000	520	1500	800	630	900	1250	1460	420	1000	1360	960	740	950	1050	1400	550	1500	1200	845	1700	850	900	850	750	400	600	1400	1200	1100	800
428	1	992	249.358	1525.33	2277.73	752.395	413.978	338.418	1000	500	700	1500	1250	1000	1000	800	1000	1250	1250	1000	1400	1250	1100	600	1000	1250	1000	600	1000	1300	600	600	1000	1250	500	1000	1250	1000	1000	1000	500	1000	1000	800	1000	1000	1250	800	600
429	1	1064.6	403.157	1525.33	2560.23	1034.9	220.714	814.19	1100	100	700	1750	1500	1100	800	1000	1200	1800	1200	1000	1300	500	1300	400	1500	1400	700	300	900	1300	980	400	700	1400	1000	1200	1500	500	1400	1000	400	1400	800	1600	1400	1000	500	1400	1300
433	1	1183	171.312	1525.33	1714.43	189.103	37.574	151.529	1500	1250	1200	1200	1250	1150	1000	1000	1450	1400	1250	1150	800	900	950	1200	1200	1550	1200	900	1100	1400	1100	1000	1000	1300	1200	1250	1250	1250	1250	1400	1000	1300	1100	900	1000	1100	1000	1250	1250
438	1	1208.2	221.47	1525.33	1790.57	265.241	18.6893	246.552	1500	600	900	1300	1200	1150	1000	900	1600	1501	1050	1200	1300	900	1200	1400	1200	1500	1200	1100	1200	1500	1299	700	1250	1450	1000	1300	1450	1001	1200	1000	1000	1500	1000	1350	1000	1222	1100	1400	1100
443	1	1169.8	251.789	1525.33	1892.58	367.253	50.1848	317.069	1300	900	900	1590	1500	1200	800	900	1450	1600	1300	800	1200	1150	1000	900	1100	1300	900	1100	1200	1650	1200	800	1200	1400	1100	1300	1750	1100	1400	1200	800	1300	900	1300	1100	1400	900	1100	1100
446	1	1313.8	332.939	1525.33	2006.76	481.434	8.99649	472.438	1750	1000	1250	1000	1500	1750	1000	1000	1500	1750	1200	800	1750	1700	1700	1500	1000	1500	1000	700	1200	1700	500	900	900	1000	1000	1300	1500	1500	1750	1500	1000	1500	1000	1700	1700	1500	1000	1000	1500
448	1	1054.4	300.979	1525.33	2251.79	726.463	244.077	482.386	1050	400	770	1050	1200	1100	800	750	1000	1600	1500	750	1300	1250	900	600	900	1240	800	760	1200	1300	740	740	840	840	1000	1200	1500	900	1100	860	700	1400	670	1500	1100	1100	680	1500	1100
100	2	851.86	225.269	1525.33	1866.56	341.233	75.0188	266.214	750	300	600	1200	1000	730	610	650	875	1130	1050	650	1100	950	780	1500	1400	1400	725	608	780	980	815	650	700	1100	750	800	750	850	750	800	550	850	600	1000	900	950	750	1025	900
103	2	924	279.985	1525.33	2140.04	614.712	196.056	418.657	750	450	550	1000	1200	700	1000	900	1400	1100	900	500	1400	1200	400	700	1200	900	1400	800	1500	1300	600	1000	900	1100	600	1100	1000	500	900	650	700	1200	1300	700	900	1000	800	1000	500
108	2	855.5	312.263	1525.33	2106.91	581.585	79.7038	501.881	800	400	600	1200	1100	700	450	430	1300	1400	1000	470	1000	820	630	470	1100	700	460	400	1150	720	630	390	900	900	650	1400	1400	770	1000	785	450	800	600	900	1000	950	580	1170	870
110	2	872	279.058	1525.33	2035.21	509.877	102.811	407.066	700	650	700	750	750	800	650	400	1300	1300	950	600	1300	900	650	700	1300	900	400	800	1100	600	400	800	1200	800	500	800	1000	800	600	1000	500	1000	1000	800	1300	800	400	1000	1200
112	2	746	115.547	1525.33	1596.5	71.1695	1.19935	69.9701	700	650	650	650	650	650	650	650	650	650	750	750	750	750	750	750	750	750	750	750	750	750	750	750	750	750	750	750	750	750	750	750	750	750	750	750	750	750	750	750	750
121	2	875	179.355	1525.33	1803.95	278.615	107.343	171.272	1000	500	700	1000	1000	850	550	500	900	1000	1000	600	1000	600	600	800	1100	1200	700	1000	1100	1200	700	1000	1000	1000	700	1100	800	800	700	700	800	1000	1000	1000	800	900	700	1000	800
123	2	848.98	250.002	1525.33	1919.87	394.537	71.4169	323.12	900	450	800	900	900	500	600	900	950	799	900	900	900	900	500	900	1250	1350	950	950	950	1250	500	950	750	950	500	1250	800	500	1250	500	750	950	1200	1200	500	500	500	600	700
133	2	860.2	158.661	1525.33	1742.58	217.247	85.973	131.274	750	500	750	1000	1000	800	600	1200	1000	850	900	550	1000	1000	1200	400	800	900	1200	1000	1000	750	750	750	750	750	750	750	850	850	1000	800	700	900	750	750	800	920	920	920	920
141	2	882	286.919	1525.33	2065.2	539.871	118.319	421.552	1000	300	1000	1200	1000	800	500	700	1000	1000	1000	500	1300	800	500	1000	1200	1500	500	500	1000	1000	700	500	800	1300	500	1000	1500	1000	1000	700	500	1000	500	1000	1000	1000	500	1000	1000
142	2	895	334.915	1525.33	2239.81	714.481	140.194	574.288	750	400	400	1200	1000	750	400	600	1200	1700	900	700	1100	450	1000	1300	1300	1500	350	650	650	1500	600	800	1050	1050	500	1200	1000	600	1700	500	750	1400	1000	1000	700	750	750	800	600
143	2	746.26	302.689	1525.33	1970.4	445.07	1.23935	443.831	1000	400	600	1246	1019	750	750	400	756	1131	1009	400	1279	858	635	500	1200	1200	400	670	1111	1294	456	500	1211	1400	498	800	700	450	500	500	750	1000	450	1000	450	500	500	600	500
146	2	885.4	301.162	1525.33	2124.44	599.11	123.852	475.258	1150	550	850	1400	1250	1100	750	600	800	1300	960	550	1350	850	560	560	950	1400	700	520	950	1400	750	350	960	1160	550	800	1400	750	870	950	550	750	500	1150	920	950	540	950	870
153	2	1082	198.659	1525.33	2416.98	891.653	675.692	215.961	700	400	750	1200	1000	750	550	600	900	1100	1000	1000	1000	1000	1200	900	1250	1400	1300	1200	1200	1100	1100	1100	1100	1100	1100	1100	1100	1100	1200	1200	1200	1200	1200	1200	1200	1200	1200	1200	1200
154	2	740.44	231.058	1525.33	1787.05	261.72	0.501826	261.218	740	500	750	750	800	800	750	600	800	1200	1000	500	1200	800	600	600	1200	900	500	450	1200	650	400	1400	700	900	600	650	1200	840	500	500	300	600	442	700	700	600	600	700	700
167	2	875.52	342.831	1525.33	2232.77	707.438	108.14	599.298	426	502	913	1348	1600	849	350	420	830	1200	1510	402	1450	1100	460	209	790	1000	502	505	750	1100	800	500	709	1300	607	670	1400	890	1120	567	700	800	1300	900	700	860	450	1100	799
170	2	1037.8	381.839	1525.33	2775.41	1250.08	511.539	738.538	1050	360	800	1500	1200	1000	650	500	1050	1700	1400	500	1850	1300	900	410	410	410	850	600	950	1300	1300	1300	800	1700	1000	1100	1500	1050	1400	1000	400	1100	450	1200	980	1250	670	1400	1200
209	2	526.26	128.057	1525.33	1748.37	223.04	173.943	49.0974	700	450	400	650	550	500	450	450	600	800	850	600	650	690	510	430	480	467	539	450	480	650	533	250	489	603	423	555	678	543	495	633	322	571	333	444	561	411	299	589	612
219	2	740	272.554	1525.33	1868.42	343.089	0.459461	342.629	900	400	800	800	1200	800	500	400	600	900	900	400	400	400	500	500	700	800	500	800	1000	700	900	300	600	800	400	900	900	800	1200	400	200	700	700	600	600	1200	500	800	1300
220	2	781.98	239.837	1525.33	1832.27	306.938	13.1391	293.799	500	500	800	1100	1500	800	700	525	550	1000	1300	500	1200	750	650	500	600	1000	500	750	900	1100	750	1200	800	900	600	600	1100	650	700	850	600	500	900	750	500	950	630	700	925
223	2	924.58	385.278	1525.33	2443.65	918.322	197.273	721.049	400	420	650	2000	1500	700	680	600	700	900	1100	500	1500	2000	1010	400	800	1200	700	450	906	1000	780	600	790	1300	900	780	1700	900	1500	879	450	900	560	1670	800	800	800	800	800
225	2	936.74	223.569	1525.33	2022.1	496.774	223.713	273.061	790	400	600	1000	1050	950	820	640	850	1101	1150	710	1300	1200	900	650	750	950	700	740	750	1100	902	526	679	1100	900	890	1200	979	1050	1000	600	1000	710	1200	1040	900	850	1280	980
231	2	811	145.086	1525.33	1662.03	136.703	32.4643	104.239	600	450	500	900	900	900	700	650	800	900	950	650	950	950	950	650	750	950	650	750	800	800	850	650	650	950	800	850	850	950	950	850	550	950	650	950	950	750	650	950	950
237	2	925.26	381.884	1525.33	2468.46	943.128	198.706	744.422	600	300	900	800	1000	800	500	390	1600	1000	940	300	1500	1000	643	1000	1400	1300	400	800	900	1300	500	390	1200	1000	500	900	1700	1500	500	1500	1000	1400	900	500	500	1000	600	1000	600
251	2	567.4	122.871	1525.33	1692.83	167.5	114.073	53.4267	750	450	450	600	650	550	500	450	600	900	600	370	700	800	500	500	600	650	650	450	550	650	400	800	800	500	400	800	600	500	800	500	400	550	350	550	500	500	500	500	550
257	2	1018	153.45	1525.33	2099.48	574.145	445.533	128.612	1250	500	1000	1200	1400	1200	1000	750	1000	1200	1200	1000	1000	1050	900	1000	1000	800	900	1000	1000	1200	800	850	900	1000	1100	1200	1500	1000	1000	1000	1000	1000	1000	1000	1000	1000	1000	1000	1000
258	2	647.28	201.595	1525.33	1725.75	200.42	31.1936	169.226	500	370	500	430	520	654	550	425	425	670	790	550	620	900	1000	500	450	750	800	890	600	850	430	500	650	900	430	750	800	890	500	430	500	700	1000	1100	460	780	500	1000	750
264	2	843.1	187.254	1525.33	1774	248.671	64.3499	184.321	800	600	800	780	1150	875	750	550	800	1000	950	650	1000	750	650	800	1150	1250	800	800	1000	850	500	750	850	1000	500	1200	1100	700	700	750	500	1000	750	1000	850	850	500	850	950
269	2	784	232.651	1525.33	1799.49	274.163	14.1991	259.964	800	750	500	800	1000	800	800	800	800	1300	1000	700	1300	600	900	500	800	900	500	500	650	1000	800	500	600	1000	500	600	1000	900	900	900	300	1000	400	1000	1000	1000	500	900	900
280	2	721.5	242.121	1525.33	1798.33	273	0.358902	272.641	500	450	500	800	1000	500	450	450	1200	1500	900	700	1100	800	500	700	1000	800	450	700	1000	800	450	800	1000	900	450	450	900	600	900	500	750	900	800	450	475	700	400	700	800
288	2	784.8	197.652	1525.33	1726.3	200.974	14.6305	186.344	500	300	350	450	550	700	600	590	650	700	750	600	650	700	750	500	600	650	690	600	650	900	910	800	650	700	750	800	900	1000	1050	1000	800	900	800	900	1000	1050	1000	1000	1000
297	2	692	246.684	1525.33	1789.82	264.494	6.80462	257.689	500	300	500	1200	1000	650	300	350	800	1000	1000	500	700	700	500	400	1000	1000	400	400	800	800	400	400	700	800	400	800	1000	800	1000	700	300	800	500	500	800	1000	500	700	700
305	2	899.82	280.406	1525.33	2090.18	564.847	148.8	416.047	700	370	500	1000	1250	1000	820	500	900	1000	1200	700	1200	1000	1000	500	790	1050	700	500	790	780	760	450	620	1250	740	800	1500	940	1000	850	550	960	600	1300	970	1010	656	1210	975
313	2	794	191.833	1525.33	1728.41	203.075	20.0704	183.005	1000	500	700	600	800	800	650	500	800	1000	800	550	800	750	650	400	600	800	700	400	800	600	1200	1000	700	1000	1100	1000	800	900	1200	800	600	800	800	550	700	900	700	900	900
315	2	862.74	289.582	1525.33	2051.71	526.382	89.4645	436.918	500	400	600	550	700	780	600	550	900	1450	1200	600	1200	1000	700	700	1100	1500	600	700	800	700	820	500	750	1000	600	957	1500	1000	1500	900	400	1000	500	1200	800	800	500	1000	1200
329	2	811.32	195.432	1525.33	1750.83	225.502	32.7271	192.775	1150	400	540	800	850	700	500	650	930	1000	960	500	990	850	900	500	600	700	750	600	800	1000	600	860	800	1100	600	700	950	500	700	600	800	860	700	1000	900	850	700	999	850
331	2	882.3	400.905	1525.33	2468.47	943.144	118.802	824.342	550	283	520	1440	1186	760	580	520	1350	1590	1267	680	600	510	637	1480	1400	1621	470	840	1257	1423	460	330	811	1320	450	510	1210	670	1100	520	420	1000	800	400	650	900	390	1200	790
338	2	809.02	291.857	1525.33	1993.07	467.739	30.8628	436.876	600	400	600	600	700	700	500	500	1200	700	800	400	1300	500	500	1500	1500	1500	1000	1000	1500	700	700	800	800	500	600	1200	900	1001	600	900	500	700	750	900	600	800	600	1000	700
345	2	903.8	292.33	1525.33	2135.17	609.844	156.109	453.734	600	400	600	1200	1100	700	500	490	1000	1600	1000	600	1000	1000	800	700	1100	1200	700	500	1000	1200	600	500	900	1200	600	1200	1400	700	1100	700	500	1300	600	1000	1000	1000	700	1200	900
348	2	919	384.242	1525.33	2439.99	914.66	185.723	728.937	800	400	750	1000	1000	800	400	600	1200	1400	100	1000	1300	800	400	200	200	800	500	500	1200	1400	600	300	1300	1600	600	1200	1500	600	1300	800	500	1200	1200	1400	1000	1200	1000	1000	1000
349	2	704	264.544	1525.33	1844.37	319.041	3.22377	315.817	400	350	750	1500	1000	900	400	450	1000	1000	1000	500	1000	500	500	500	500	1000	500	400	700	900	500	500	600	1000	400	800	900	700	1200	500	500	800	300	1000	750	750	500	750	500
354	2	641.6	266.826	1525.33	1864.22	338.891	35.4856	303.405	750	250	555	750	1000	750	500	400	600	900	900	350	800	500	500	300	500	700	400	375	500	800	400	400	600	700	400	1000	1400	600	1500	500	400	600	400	700	800	700	400	700	700
358	2	714	130.556	1525.33	1603.92	78.5873	1.23965	77.3477	600	400	550	600	900	600	600	600	600	800	800	600	600	800	600	600	600	600	600	600	900	900	600	600	600	900	600	700	900	600	700	800	800	800	600	800	800	800	800	800	900
366	2	1011	316.436	1525.33	2477.37	952.041	423.319	528.722	400	750	1000	1500	1200	700	550	1200	1300	1200	700	1500	1000	950	500	800	1050	1000	500	600	1100	1300	1000	700	1200	900	850	1100	1000	800	1000	1500	1200	1300	1000	1200	800	700	1200	1600	800
367	2	785.2	253.782	1525.33	1861.23	335.902	14.8487	321.053	700	500	550	800	1000	750	480	400	800	1000	1000	500	1000	700	500	800	1000	700	500	900	1000	500	450	1000	1000	600	680	800	400	600	1000	700	500	900	600	1000	800	900	550	1200	700
368	2	773.2	40.2766	1525.33	1542.19	16.8573	9.01942	7.83786	900	750	600	750	750	750	750	680	690	720	750	750	750	800	800	780	790	800	800	750	750	780	790	780	780	780	790	790	790	790	790	800	780	780	780	780	790	780	780	780	780
370	2	796	182.902	1525.33	1714.65	189.32	21.37	167.95	700	400	500	1000	1100	800	1000	600	700	1000	800	700	1000	500	1000	1000	1000	600	600	700	1000	1000	600	800	1000	800	700	700	1000	700	700	700	700	1000	700	1000	700	700	500	1000	700
371	2	1003	257.097	1525.33	2280.85	755.522	398.649	356.873	1300	1000	750	1250	950	800	800	760	1200	1500	1300	600	1000	750	900	900	1200	1200	1000	900	1400	1400	1000	1000	1000	1300	600	1100	1000	750	1400	600	600	1000	900	1100	730	1250	920	1120	850
376	2	1156.98	445.828	1525.33	3489.14	1963.81	1006.14	957.678	420	440	800	1800	1350	500	500	550	1500	1800	1250	1400	1300	1800	1500	1200	1800	1500	390	550	1200	1600	600	600	1000	1200	550	1300	1200	800	1500	1500	1000	1500	800	1800	850	1200	950	1700	1850
386	2	771.26	138.727	1525.33	1633.29	107.959	8.21547	99.7433	750	500	650	750	1200	850	677	752	790	800	810	800	802	804	806	805	500	600	800	750	1500	750	770	756	756	756	756	756	750	750	762	760	756	762	780	763	740	730	739	742	743
387	2	810.4	166.451	1525.33	1696.46	171.126	31.9746	139.151	750	400	550	600	1000	800	750	550	600	1000	1100	730	750	1000	750	750	800	900	750	800	900	1000	750	600	800	1000	750	750	1000	750	700	750	500	900	750	900	900	1000	500	750	1000
396	2	783	222.144	1525.33	1785.59	260.26	13.669	246.591	600	400	500	800	700	650	600	400	700	900	800	600	1000	700	600	600	1000	1000	700	600	900	1000	500	500	900	1100	600	800	1200	600	800	600	500	900	700	1400	1000	1000	600	1000	800
406	2	823.8	251.639	1525.33	1882.74	357.414	43.8341	313.58	800	500	600	1000	1000	900	500	700	1200	1100	1000	700	1300	900	650	500	800	1100	550	300	900	950	750	490	500	1000	650	1200	900	750	1000	850	300	1200	500	1000	950	700	500	1100	900
407	2	999.6	363.301	1525.33	2605.7	1080.37	388.396	691.978	500	450	680	1200	1500	1000	600	500	1200	1600	1200	800	1500	1000	700	500	1000	1500	700	500	500	1000	800	500	1200	1700	500	1000	1500	800	1200	1200	500	1200	1200	1200	900	1400	850	1400	1500
425	2	777.92	341.675	1525.33	2096.64	571.315	11.1358	560.179	350	356	700	1500	900	700	550	600	1000	1500	300	510	1200	550	800	450	1100	750	600	750	1050	890	630	350	780	1200	500	1250	1200	400	1400	350	560	900	290	1100	550	1000	300	1080	500
430	2	864.58	334.259	1525.33	2193.82	668.491	92.0392	576.452	700	500	700	1000	1000	700	700	800	1100	800	800	500	1000	600	600	1500	1500	1500	350	350	1200	1000	400	600	1200	1200	500	1200	1200	500	900	500	700	1000	500	1100	800	800	500	1200	600
432	2	1068.7	272.657	1525.33	2545.13	1019.8	623.869	395.931	750	265	800	1000	1250	1000	1000	1000	1250	1350	800	1280	900	900	700	1500	1400	1500	700	990	1000	1200	800	1250	1250	1300	700	1100	1500	900	1000	1500	700	700	1000	1250	1250	1250	1000	1250	1200
437	2	750.5	163.077	1525.33	1663.29	137.961	1.98521	135.976	550	550	550	550	650	700	700	675	675	675	675	675	900	750	700	650	1000	1200	1000	650	700	1100	600	650	800	1200	650	650	800	800	1000	650	650	800	800	850	650	650	650	650	650
440	2	935.4	171.859	1525.33	1911.04	385.708	220.714	164.995	670	600	670	900	1200	1000	900	670	900	1100	1100	670	1100	1100	900	900	950	1100	1100	1000	1200	1400	1000	1200	1000	1200	800	670	1200	900	900	800	800	1100	800	800	800	1000	670	900	900
442	2	859	269.877	1525.33	1990.72	465.389	84.3488	381.04	1100	750	730	1000	1100	780	600	540	1200	1400	1100	500	1000	750	800	800	1500	1100	400	600	800	600	500	750	680	1100	500	800	1100	980	1500	550	550	1200	500	1100	750	1200	700	750	750
455	2	788.6	229.747	1525.33	1799.41	274.083	16.7706	257.312	800	500	500	600	800	750	1000	600	700	800	1000	700	400	900	800	700	500	800	1100	900	700	1100	500	750	1000	870	1100	400	500	500	800	300	890	700	700	1200	600	870	600	900	800
456	2	644	175.732	1525.33	1700.32	174.991	33.6404	141.35	600	600	600	550	550	800	550	550	550	550	1000	550	550	550	550	1000	550	550	550	550	1000	550	550	550	550	550	550	550	550	550	550	550	800	1000	550	550	550	550	550	1000	1000
458	2	845	102.892	1525.33	1645.87	120.535	66.5914	53.9439	700	450	700	1000	1000	900	700	600	900	1100	1000	650	1000	800	800	800	800	800	800	800	800	850	850	850	850	850	850	850	850	850	875	875	875	875	875	875	875	875	875	875	875
460	2	884	246.079	1525.33	1959.58	434.255	121.558	312.697	650	450	500	1100	1100	900	600	500	750	1100	1200	900	1200	1000	750	300	900	1000	800	450	800	1100	850	600	750	1100	900	900	1200	1100	1200	950	450	900	500	1000	1000	1050	800	1100	1200
462	2	795.6	246.876	1525.33	1853.23	327.903	21.1067	306.796	800	400	750	1400	1100	750	500	480	750	1300	1100	750	1400	750	700	450	750	900	750	500	750	1000	750	500	500	750	750	750	1400	750	1000	750	300	750	750	750	800	900	600	800	750
106	3	1084.8	188.78	1525.33	1901.9	376.568	178.067	198.501	1300	1000	1000	1200	1400	1300	1000	750	900	1200	1200	700	1200	1000	1200	1000	1000	1200	800	1000	700	700	1200	1000	1000	1200	1100	1050	1100	1150	1200	1150	700	1100	800	1000	1100	1220	900	1300	1300
107	3	972.18	247.419	1525.33	2336.81	811.477	477.685	333.793	1400	750	1100	1250	1250	1100	900	800	1000	1200	1100	500	700	1000	1000	600	900	1100	700	700	1100	1300	700	800	850	1100	850	1100	1100	900	1000	1200	400	800	700	900	1200	900	750	900	1150
109	3	1159.6	274.769	1525.33	1977.91	452.579	61.2333	391.346	1400	650	1000	1100	1500	1050	1000	1200	950	1350	1100	750	1250	850	1200	900	1500	1300	800	550	1050	1200	1300	700	1000	1500	1300	1100	1400	1200	1400	1300	600	1000	750	1500	1350	1300	970	1360	1050
114	3	1191	211.817	1525.33	1794.75	269.415	30.8469	238.568	1200	800	1000	1300	1500	1200	800	800	1300	1400	1500	800	1300	600	1300	1300	1200	1300	1300	1000	1200	1300	1200	1000	1100	1300	1200	1200	1250	1200	1400	1300	500	1200	1000	1200	1400	1400	1300	1350	1300
117	3	719	188.293	1525.33	3363.92	1838.59	1686.59	151.999	930	320	450	670	860	950	600	520	610	710	840	470	570	690	750	350	500	680	740	440	650	720	750	540	800	900	780	890	860	930	800	960	300	750	420	600	800	770	670	900	870
127	3	1125	123.408	1525.33	1718	192.669	107.343	85.3251	1250	1200	1000	1200	1250	1200	1000	750	1200	1200	1250	1000	1250	1200	1200	1200	1200	1250	1000	1200	1200	1000	1000	1150	1150	750	1200	1150	1200	1200	1250	1150	1000	1150	1100	1200	1250	1000	1150	1300	1000
132	3	1045.4	338.147	1525.33	2345.08	819.752	265.716	554.036	800	400	450	700	1000	900	800	600	900	1000	750	600	800	1100	900	750	1500	1000	800	800	1500	700	1000	1000	1000	1200	800	1220	1000	1500	1100	900	1000	1000	1500	1200	1000	800	900	1300	1100
136	3	1086.76	208.289	1525.33	1938.28	412.951	174.184	238.768	1360	1120	933	1200	1300	1100	1100	800	1200	1300	1300	633	1200	1200	1000	833	833	1190	467	788	1222	1244	1122	1122	1222	1200	1122	1100	1200	833	1200	1122	666	1100	899	1100	1222	1000	1000	1111	1111
139	3	1056.04	290.212	1525.33	2216.44	691.111	240.237	450.874	1400	1200	1100	1400	1250	750	500	750	1000	1500	1100	750	1350	1450	500	960	890	1160	390	1200	1020	800	700	1000	1100	1400	600	700	1300	600	1123	1390	1200	870	1100	1600	900	900	1269	1200	987
140	3	544.6	182.401	1525.33	4506.49	2981.16	2878.34	102.826	360	450	500	550	650	640	650	650	760	550	520	700	750	600	550	500	500	700	700	700	700	700	500	650	650	650	600	600	600	600	300	300	250	250	250	250	250	250	300	300	500
145	3	1065	277.056	1525.33	2165.59	640.26	219.822	420.438	1400	500	1000	1400	1400	1200	800	700	1000	1400	900	800	1350	1000	1000	800	1300	800	1200	800	1000	1200	550	1200	800	900	1000	1200	800	1200	1400	1000	500	1200	600	1300	1300	1300	600	1300	1350
149	3	1086	310.207	1525.33	2212.39	687.056	175.684	511.372	600	500	800	1250	1200	750	700	700	700	700	1250	1000	1100	1500	1500	1500	1000	1200	700	1000	1200	1700	700	700	1200	1500	1200	1200	1300	1300	1400	800	700	1400	1500	1000	1150	1100	600	1200	1450
150	3	524.92	95.025	1525.33	4580.14	3054.81	3026.55	28.2596	800	400	400	450	450	500	600	450	500	530	548	450	470	480	500	400	420	450	550	460	460	470	500	548	560	500	500	520	550	550	530	550	350	380	400	500	550	600	600	600	600
156	3	873	235.272	1525.33	2686.86	1161.53	866.31	295.215	1200	450	525	650	825	1000	650	600	750	825	1000	625	800	1200	900	525	800	925	800	500	700	800	950	600	700	900	900	1000	1300	1200	1300	1000	500	700	600	800	950	1000	850	1000	1150
157	3	1084.94	160.013	1525.33	1846.73	321.405	177.788	143.617	950	600	900	1050	1150	1035	900	750	1000	1085	1150	1000	1200	1150	1100	1000	1300	1200	1000	1000	1100	1267	1000	1200	1200	800	800	1100	1300	1200	1250	1000	800	1000	1000	1260	1300	1150	1000	1260	1130
160	3	1018.6	270.011	1525.33	2252.5	727.165	335.865	391.3	1100	750	800	950	1200	1000	750	600	750	1200	1500	800	1100	1100	950	750	1200	1500	500	1200	1500	750	1000	1050	750	1500	1000	1150	1500	900	1000	1000	500	900	1000	1500	890	990	500	750	1200
161	3	515.9	128.828	1525.33	4665.81	3140.48	3095.25	45.2327	850	350	420	450	630	735	680	524	535	547	547	511	511	482	482	370	429	440	440	473	511	534	565	559	559	564	578	593	599	621	634	645	234	235	245	254	311	379	405	439	489
174	3	1196	145.98	1525.33	1666.29	140.96	26.9899	113.97	1250	1300	1300	1350	1400	1200	1000	800	1400	1400	1300	1000	1300	1250	1250	1300	1200	1250	1200	1200	1200	1300	1000	1300	1300	1200	1200	1200	1200	1000	1200	1200	1400	1200	1200	1200	1200	1350	1000	1200	1100
177	3	825.66	195.915	1525.33	2793.52	1268.19	1091.67	176.519	250	300	350	400	550	600	675	700	500	700	1000	850	925	1025	1000	900	1000	1000	1000	900	800	750	800	850	723	845	775	825	875	925	975	1040	900	950	800	850	825	900	800	850	900
203	3	1094	198.628	1525.33	1902.68	377.35	160.229	217.121	1250	1000	1250	1450	1250	1250	1250	1000	1250	1450	1200	700	1000	1400	1000	800	800	1000	800	1250	1250	1000	800	1000	1000	1000	1000	1250	1000	1000	1250	1000	1000	1250	1250	1300	1100	800	1100	1400	700
205	3	519.8	73.886	1525.33	4612.49	3087.16	3065.49	21.6737	1000	400	450	500	500	470	470	480	480	480	500	500	510	520	540	500	510	510	520	500	510	500	510	510	510	520	520	525	530	535	540	545	520	520	500	500	500	510	520	520	520
216	3	672	143.981	1525.33	3596.79	2071.46	1983.61	87.8555	1100	400	500	750	850	950	650	550	650	700	800	600	650	650	700	400	500	550	600	500	500	550	600	550	650	650	700	750	750	800	850	900	400	550	500	550	600	700	750	800	800
217	3	620.36	86.9738	1525.33	3881.89	2356.56	2331.64	24.92	400	350	360	380	500	600	600	550	560	570	700	580	600	610	650	600	620	630	640	620	630	640	650	630	630	635	645	650	660	700	720	740	650	650	630	625	640	650	660	620	660
221	3	1073	281.977	1525.33	2151.32	625.995	202.396	423.599	1250	500	800	1200	1500	1200	800	700	900	1500	1400	800	1200	1200	1100	500	800	1200	1000	800	1200	1500	900	600	800	900	900	1000	1200	1200	1500	1200	500	1200	800	1000	1200	1500	1000	1200	1200
227	3	1109	190.244	1525.33	1852.79	327.46	133.256	194.204	1400	1000	1000	1400	1500	1300	750	750	950	1600	1200	900	1300	1100	1050	700	1400	1200	950	1250	1100	1100	1000	850	950	1100	1100	1150	1150	1150	1200	1100	700	1100	900	1100	1250	1200	900	1250	1100
236	3	1051	396.733	1525.33	2583.32	1057.99	252.139	805.853	600	650	1000	1500	1500	1300	400	550	1300	1700	1000	1300	1500	1700	1000	500	750	1300	800	800	1200	1000	600	1000	1300	500	1300	1300	1300	400	1600	1400	600	1000	800	1250	750	500	1000	1300	400
239	3	742	121.265	1525.33	3141.47	1616.14	1548.67	67.469	950	500	650	700	800	900	750	650	700	800	750	600	700	750	800	500	700	800	700	600	650	700	500	700	700	800	800	800	825	850	900	925	500	700	500	600	650	700	800	850	900
243	3	1021.4	315.989	1525.33	2388.09	862.755	328.135	534.621	500	400	450	470	550	620	740	740	1000	1100	1400	1300	1200	1200	1500	1300	1200	900	800	500	600	700	800	700	700	800	900	900	1000	1100	1200	1100	1100	1200	1200	1200	1300	1000	1100	1100	1500
245	3	1028	171.476	1525.33	2000.01	474.68	310.285	164.395	1000	1000	1000	1200	1400	1200	800	700	1100	1200	1200	600	1000	1200	1000	800	1000	1200	1100	1000	1000	1200	1000	1000	1000	1000	1200	1200	800	1000	1000	800	600	1000	1000	1000	1200	1000	1000	1400	1000
247	3	694.8	158.259	1525.33	3474	1948.67	1837.05	111.612	400	500	700	900	1000	950	500	550	700	800	850	500	600	750	750	500	600	1000	600	400	500	600	550	650	640	700	650	800	750	900	800	1100	700	650	500	700	600	800	550	700	700
248	3	831	141.742	1525.33	2696.75	1171.42	1065.01	106.408	1400	1000	800	600	900	900	600	800	900	1000	1100	800	900	1000	800	600	700	800	700	600	800	900	800	700	600	700	700	800	850	850	900	950	900	900	700	800	800	900	700	850	900
259	3	1207	287.141	1525.33	1968.89	443.56	19.4363	424.124	1100	600	1100	1500	1500	1300	800	500	900	1400	1400	700	1400	1400	700	1300	1300	800	700	1300	1300	900	800	1300	1300	1300	1000	1400	1300	800	1400	1400	1000	1400	1400	1300	1400	1350	1400	1300	1100
263	3	732.1	144.031	1525.33	3225.64	1700.31	1607.42	92.8968	1000	400	425	450	600	750	700	600	625	650	700	625	650	675	700	500	600	650	750	500	550	600	675	600	650	700	725	750	775	825	875	925	800	825	800	825	850	850	850	875	900
266	3	571.4	165.067	1525.33	4290.88	2765.55	2680.43	85.1194	225	380	660	850	800	900	600	440	550	575	600	380	550	600	660	20	800	800	550	500	500	550	575	550	575	600	650	675	700	740	800	850	440	520	330	390	425	470	520	500	500
273	3	1009	194.75	1525.33	2100.26	574.928	363.08	211.849	1250	800	850	1000	1300	1000	900	750	900	1100	1250	1000	1000	1250	1100	750	1100	1250	1250	1250	1000	1250	900	900	900	1100	550	1100	1100	1000	1000	1000	600	900	600	800	1000	1100	600	900	1200
278	3	1101	140.149	1525.33	1781.98	256.649	147.317	109.332	1000	800	800	1000	1100	1000	800	1000	1100	1100	1200	800	1100	1200	1100	1000	1050	1200	1050	1050	1050	1200	1100	1100	1050	1100	1000	1100	1200	1100	1300	1000	800	1200	1100	1100	1200	1100	1100	1200	1100
293	3	1270.6	4.24264	1525.33	1525.42	0.0852166	0.00262949	0.0825871	1270	1270	1270	1270	1300	1270	1270	1270	1270	1270	1270	1270	1270	1270	1270	1270	1270	1270	1270	1270	1270	1270	1270	1270	1270	1270	1270	1270	1270	1270	1270	1270	1270	1270	1270	1270	1270	1270	1270	1270	1270
299	3	1043.54	335.977	1525.33	2378.26	852.927	270.308	582.619	1300	448	1300	1690	1699	1179	790	685	685	890	1158	640	800	1000	1059	474	593	740	865	582	728	910	1099	702	811	1000	1000	1200	1000	1250	1500	1200	300	1250	1000	1250	1400	1400	900	1200	1300
303	3	1051.08	306.353	1525.33	2277.4	752.074	251.947	500.126	1000	500	1001	1500	1400	1000	700	600	750	850	1500	1000	1500	1400	1000	500	800	1200	1000	600	900	1500	1400	900	949	1200	1204	1100	1500	900	1100	1100	500	600	700	900	1100	1500	1000	1500	900
306	3	811.08	209.448	1525.33	2921.84	1396.51	1166.05	230.463	1100	750	700	800	900	950	800	600	750	800	850	700	750	1000	900	600	700	800	500	1100	700	750	600	800	500	650	650	800	800	1100	1250	900	650	700	500	550	750	800	600	678	746
330	3	759.78	265.054	1525.33	3329.61	1804.28	1445.56	358.719	1100	500	600	600	650	700	620	580	560	550	700	650	630	610	1000	500	600	650	660	600	500	550	550	570	590	590	600	1000	1100	1000	990	999	500	600	400	500	600	650	660	700	1000
336	3	1235.16	464.387	1525.33	2460.67	935.343	5.82711	929.516	500	476	667	1066	1700	1506	900	762	1295	2000	2000	307	491	1000	1100	600	1000	1399	909	700	1300	1650	1200	800	992	1300	1200	1422	1991	1432	2000	1308	400	1066	899	1400	1600	1560	1050	1490	1450
339	3	552	154.18	1525.33	4435.81	2910.48	2823.23	87.25	1100	400	800	800	900	900	700	600	600	700	500	400	600	700	500	400	500	500	600	500	600	600	700	500	600	600	600	500	500	500	600	600	300	400	400	400	500	500	500	500	600
346	3	1103	72.4287	1525.33	1698.59	173.261	143.732	29.5289	1100	1000	1050	1100	1100	1050	1050	1000	1150	1200	1200	1050	1100	1200	1050	1000	1050	1200	1050	1000	1050	1150	1050	1000	1050	1100	1050	1200	1250	1100	1150	1100	1000	1100	1050	1150	1200	1200	1200	1200	1150
347	3	1253	196.503	1525.33	1714.71	189.378	1.35682	188.021	1100	1000	1100	1200	1500	1200	1000	700	1300	1600	1400	800	1500	1400	1000	1000	1300	1300	1000	1300	1200	1500	1100	1000	1300	1500	1200	1400	1300	1200	1400	1400	1100	1400	1200	1300	1300	1000	1150	1400	1300
350	3	632.58	172.666	1525.33	3897.65	2372.32	2247.35	124.966	650	375	385	400	450	475	550	550	600	700	760	550	600	625	629	420	550	550	580	580	580	580	590	550	550	560	570	560	580	600	650	680	300	400	550	650	650	700	750	850	950
352	3	975.88	324.319	1525.33	2546.53	1021.2	465.435	555.762	630	630	590	1050	950	590	860	700	1000	570	980	1300	1260	542	1700	1090	1300	680	900	700	1350	1000	850	1240	790	1100	900	1250	1500	600	980	1500	400	790	600	1090	1400	750	450	805	1307
359	3	615	104.242	1525.33	3932.54	2407.21	2368.97	38.2412	300	340	410	440	510	570	600	530	550	580	620	580	580	610	620	590	580	620	600	600	590	650	630	700	560	590	620	600	680	620	700	740	560	600	530	600	710	800	700	640	670
361	3	1250.3	330.631	1525.33	2038.69	513.36	1.83096	511.529	1250	1000	970	1200	1280	1300	760	800	1690	1559	1200	700	1600	1500	1200	1000	1500	1500	800	800	1670	1500	600	800	900	1356	1300	1500	1500	600	1300	1340	1450	1460	800	1300	1400	1500	1000	1600	1300
363	3	657.26	157.279	1525.33	3713.91	2188.58	2080.73	107.849	1000	500	500	600	600	668	720	650	738	810	908	650	750	810	600	450	500	650	750	550	600	450	550	611	700	759	800	849	890	940	1100	1000	380	500	490	540	650	500	540	600	640
373	3	948.78	239.613	1525.33	2395	869.672	558.933	310.739	520	600	1000	1200	1500	1000	900	650	900	1200	1500	650	1000	1300	1300	1300	850	1000	850	850	860	1150	1159	600	650	900	1000	1100	1100	1050	1140	500	860	1050	750	750	1050	1200	950	950	950
375	3	761.8	298.573	1525.33	3402.06	1876.73	1434.04	442.691	600	400	500	500	500	600	400	700	1000	1200	1500	500	500	600	600	400	500	600	700	500	500	550	600	650	700	750	800	850	900	950	1000	990	400	500	450	500	600	700	1500	1400	1000
377	3	929.6	319.061	1525.33	2668.8	1143.47	630.377	513.091	1000	750	1250	1200	1110	1200	900	900	1000	1300	1200	550	400	300	400	350	420	550	550	900	1300	1200	1000	600	700	1000	700	900	1100	1000	900	800	900	100	900	900	1000	700	1500	1200	1250
383	3	769	225.979	1525.33	3168.24	1642.91	1393.33	249.588	400	370	450	500	600	800	600	600	650	700	780	600	700	800	900	500	500	650	750	600	750	850	950	700	750	850	900	1000	1100	1200	1350	1100	400	500	500	600	700	800	800	900	1000
384	3	1180.46	519.423	1525.33	2790.94	1265.61	39.8538	1225.75	890	1500	470	1800	1100	1888	350	1111	899	1777	777	1500	1300	757	1200	1500	1666	555	1444	1414	1234	1555	1777	435	1111	1111	1111	1899	1899	1899	344	1777	457	777	1111	1600	890	890	890	1888	1888
394	3	554.98	83.9763	1525.33	4347.68	2822.35	2801.14	21.2103	500	500	480	520	600	400	750	480	520	540	390	490	550	600	610	480	522	513	599	510	520	600	580	570	600	590	598	610	611	615	623	631	310	350	470	501	514	490	524	600	616
403	3	1061.8	240.371	1525.33	2063.25	537.925	227.004	310.92	1000	1500	1000	1400	800	1000	900	800	1200	1500	1000	800	1200	1500	1000	700	1200	1500	1000	800	1200	1000	700	1000	1000	1200	1000	1000	1500	800	700	1000	800	1000	700	800	1000	1200	1000	1200	1200
422	3	1117	157.016	1525.33	1780.66	255.327	119.933	135.394	1500	1000	900	1200	1250	900	1000	800	1200	1200	1250	1300	1400	1300	1000	800	1200	1200	900	1200	1100	1150	1000	800	1100	1000	1200	1300	1000	900	1000	1300	1200	1200	1000	1200	1100	1300	1000	1200	1200
424	3	977	228.841	1525.33	2274.72	749.387	461.76	287.628	1500	1200	1200	1200	1200	1200	1200	1000	1200	1200	1200	750	1000	1200	1000	800	1000	1200	800	800	1000	1200	500	700	800	1000	1000	1000	1200	1000	800	700	700	1000	500	700	1000	1200	600	1000	800
431	3	930.38	240.318	1525.33	2465.96	940.627	627.387	313.241	1100	1400	700	700	1000	1250	700	400	600	850	900	700	800	900	875	650	754	800	600	700	690	600	550	500	600	800	1000	1100	1200	1000	1100	1200	900	1000	950	1000	1100	1100	1000	1100	1050
434	3	883.4	191.925	1525.33	2543.39	1018.06	820.181	197.874	1400	450	510	550	700	1200	750	700	750	850	900	600	900	1200	850	600	900	800	650	1000	800	800	850	900	850	860	700	1000	1200	900	1100	1100	800	1000	800	900	900	900	1000	900	900
435	3	1142	165.172	1525.33	1759.45	234.122	83.0076	151.115	1250	1200	1000	1250	1250	1250	1000	750	1000	1250	1250	700	1000	1250	1000	500	1250	1250	1200	1250	1200	1250	1200	1200	1200	1200	1200	1200	1200	1200	1200	1200	700	1200	1000	1200	1200	1200	1000	1200	1250
436	3	1267	174.265	1525.33	1668.6	143.273	0.0368685	143.236	1500	1500	1500	1500	1500	1400	1300	1200	1200	1300	1400	1400	1500	1400	1350	1500	1400	1300	1250	1250	750	1000	1000	1000	1200	1100	1100	1500	1200	1100	1100	1100	1100	1500	1500	1300	1300	1200	1400	1200	1100
441	3	1365.4	184.005	1525.33	1701.37	176.044	41.1303	134.914	1500	1200	1100	1600	1500	1250	1100	1200	1500	1600	1600	1100	1500	1450	1200	1250	1550	1500	1200	1250	1500	1200	1100	1000	1500	1200	950	1300	1500	1600	1500	1300	1300	1500	1100	1500	1300	1650	1500	1400	1700
449	3	1445	89.9263	1525.33	1683.53	158.205	130.987	27.218	1500	1500	1300	1500	1450	1350	1400	1400	1450	1500	1450	1300	1500	1300	1400	1400	1450	1450	1300	1400	1400	1500	1300	1300	1300	1500	1300	1400	1500	1500	1550	1500	1200	1500	1500	1550	1600	1550	1500	1550	1500
450	3	1206	137.633	1525.33	1642.64	117.307	20.0704	97.2362	1250	1250	1250	1400	1450	1250	1000	1000	1250	1400	1400	1000	1250	1250	1000	1000	1250	1400	1000	1100	1250	1500	1000	1000	1000	1250	1000	1250	1300	1250	1300	1250	1000	1250	1000	1250	1250	1250	1200	1250	1250
453	3	1053	222.098	1525.33	2043.61	518.28	247.38	270.9	1000	500	750	1200	1200	1100	1000	1000	1000	800	1100	600	1500	1250	1000	1000	1250	1250	700	700	1200	1100	600	700	1100	1250	1000	1000	1250	1000	1300	1000	800	1200	1200	1200	1200	1250	800	1000	1200
454	3	1283.32	241.082	1525.33	1786.67	261.338	0.864703	260.473	1500	666	1250	1343	1425	1634	1500	1345	1210	1650	1300	1434	1565	1675	1458	1210	1310	1466	1688	1000	1323	1100	1000	1233	950	1345	1000	1200	1300	1210	1450	1453	1255	1100	910	1800	1407	1210	899	1101	1300
457	3	1084	261.947	1525.33	2067.94	542.609	179.665	362.945	1000	400	1000	1200	1600	1200	1000	750	1000	800	1000	750	1000	1400	900	500	1200	1400	1000	1000	1200	800	1000	600	1200	1400	1200	1000	1400	1200	1200	1000	1200	1000	1000	600	1200	1400	1000	900	1200
459	3	743.04	255.777	1525.33	3386.35	1861.02	1542.55	318.474	400	500	450	550	490	550	750	600	650	700	1000	300	600	720	720	600	750	900	400	600	702	500	550	700	650	700	900	1200	1500	1200	1300	1000	450	700	500	550	700	1000	500	900	1200
461	3	1288.94	168.399	1525.33	1657.27	131.939	1.72753	130.212	1500	1500	1200	1500	1500	1350	1250	1250	1250	1600	1350	600	1200	1300	1250	1200	1200	1300	1200	1200	1300	1500	1000	1250	1250	1500	1250	1400	1150	1000	1600	1250	1250	1350	1337	1250	1200	1200	1200	1400	1200
102	4	777.8	211.774	1525.33	1759.46	234.131	11.0792	223.052	1200	600	750	825	850	850	625	525	650	740	815	525	575	650	725	400	475	540	500	600	800	800	1000	625	800	800	700	1000	1100	950	1000	1100	400	800	525	575	700	850	700	720	750
113	4	779	255.968	1525.33	1868.89	343.558	11.6522	331.905	650	450	500	600	700	800	600	550	550	600	600	550	550	600	600	500	550	600	550	700	1000	500	1000	1000	700	700	400	800	900	600	700	1000	1200	700	1100	700	600	900	1100	1100	450
116	4	857.6	248.527	1525.33	1928.9	403.567	82.4743	321.093	1200	600	700	1000	1300	980	500	800	1300	1000	1100	500	1000	1300	600	800	1300	1000	400	1000	1000	1250	600	1000	800	1000	800	850	700	650	800	900	400	500	700	1000	900	500	500	700	1000
122	4	860	239.472	1525.33	1905.59	380.265	85.7012	294.564	800	500	800	800	1000	900	800	800	950	1000	1100	600	850	1000	700	500	750	800	500	400	800	800	800	400	1000	900	500	1200	1000	1300	1500	1000	450	1200	750	900	1000	1000	550	1000	1000
124	4	702.64	67.0707	1525.33	1547.76	22.4255	3.56429	18.8612	800	357	700	700	700	1000	700	700	700	750	700	700	700	700	725	700	700	700	700	700	700	700	700	700	700	700	700	700	700	700	700	700	700	700	700	700	700	700	700	700	700
125	4	885.76	279.189	1525.33	2054.17	528.84	124.446	404.394	980	400	750	1300	1400	650	800	650	1100	1500	700	1600	1100	450	1050	548	600	900	500	760	1150	900	700	660	700	800	1000	1480	810	1200	900	400	800	450	500	800	1000	800	800	800	900
126	4	759	98.2967	1525.33	1574.6	49.268	4.01507	45.2529	900	450	550	650	800	1000	750	650	750	850	950	700	800	850	850	500	750	800	750	750	750	750	750	700	700	700	700	700	800	800	800	900	700	700	700	700	700	800	750	750	750
128	4	667.42	139.898	1525.33	1626.26	100.932	18.1069	82.825	750	340	400	450	500	550	600	560	552	600	650	550	576	600	670	600	700	700	650	500	550	560	600	570	600	700	800	870	600	800	900	1100	570	800	670	700	700	765	558	700	800
130	4	744	136.89	1525.33	1610.71	85.3813	0.913755	84.4676	500	400	450	500	750	850	700	500	600	750	800	600	700	750	800	500	700	750	750	650	750	800	800	600	750	750	800	800	900	900	1000	1000	550	800	700	750	750	800	750	800	800
135	4	473.96	164.457	1525.33	1865.03	339.705	264.403	75.3015	1000	350	342	334	326	318	318	350	450	600	800	224	230	280	300	350	380	420	430	480	510	600	610	512	520	530	540	550	560	580	650	800	230	240	255	275	350	400	459	465	475
147	4	855.84	263.549	1525.33	1951.18	425.849	80.149	345.7	750	240	250	800	1000	943	600	500	800	1000	1200	630	900	900	380	600	800	700	650	450	1000	1000	799	400	900	1100	700	1000	1000	1200	1200	800	800	1200	600	1000	1200	1200	600	900	1200
152	4	557.2	90.1765	1525.33	1679.84	154.509	127.913	26.5963	600	400	425	475	550	600	700	500	550	555	575	500	525	530	550	400	450	475	500	500	550	550	450	550	600	650	400	650	700	750	500	750	500	550	500	450	500	550	550	600	500
164	4	687.6	121.329	1525.33	1597.28	71.9536	8.44019	63.5134	860	400	750	750	850	850	650	500	650	850	950	600	750	550	600	600	750	750	600	550	650	700	650	550	700	700	650	500	550	650	650	700	500	650	650	670	750	700	700	650	650
165	4	469.36	150.406	1525.33	1857.72	332.392	273.054	59.3376	850	370	382	394	406	418	430	442	454	466	478	490	502	514	526	538	550	562	574	586	598	610	610	622	634	646	658	670	682	694	706	718	248	260	272	284	284	296	296	296	308
169	4	687.8	123.723	1525.33	1602.75	77.4223	8.36213	69.0602	700	450	550	690	750	800	600	550	600	650	620	520	600	620	660	550	620	650	550	650	620	620	550	630	650	650	680	700	780	900	1000	1000	500	700	600	620	680	680	800	800	700
175	4	633.8	255.086	1525.33	1840.07	314.739	41.8001	272.939	800	800	800	1000	800	1000	800	500	600	700	800	500	550	600	630	350	300	400	350	450	300	400	350	500	450	400	460	600	1000	1200	900	800	250	300	400	500	550	600	500	450	600
181	4	1045	292.814	1525.33	2515.77	990.439	536.7	453.739	1000	400	450	500	1000	1000	800	600	700	800	1000	600	800	1000	1000	500	600	800	1000	1000	1000	1200	1000	1000	1000	1100	1100	1100	1200	1200	1100	1300	1000	1100	1100	1200	1500	1500	1500	1500	1500
182	4	712.8	153.793	1525.33	1631.31	105.982	1.42913	104.553	1035	400	430	450	460	475	520	600	800	950	1000	750	800	850	800	600	800	800	700	560	600	700	800	580	700	880	700	800	500	700	800	850	800	800	600	700	500	700	850	900	1000
210	4	535.44	102.964	1525.33	1715.91	190.576	159.669	30.9069	700	200	350	500	650	675	632	550	480	550	630	480	670	590	470	640	700	740	580	400	450	500	540	550	575	600	580	580	600	650	675	700	400	445	450	475	490	500	525	450	475
212	4	733.7	189.443	1525.33	1698.89	173.56	0.0579179	173.502	750	450	475	525	560	590	610	570	575	585	590	575	585	590	590	550	580	585	625	575	600	605	615	575	650	690	790	830	900	950	1000	1050	500	750	650	750	850	950	800	900	1000
222	4	1089.48	406.568	1525.33	3101.21	1575.88	705.749	870.126	550	500	550	600	650	750	700	600	620	650	650	600	632	650	672	500	800	1000	750	700	1000	1300	900	700	850	1000	1300	1300	1500	1500	1500	1500	1500	1500	1500	1500	1500	1500	1500	1500	1500
229	4	765	203.101	1525.33	1729.62	204.293	5.88157	198.412	1300	450	550	800	1300	1000	600	400	300	500	700	650	700	800	800	600	700	800	700	650	700	800	800	650	700	800	800	900	900	1000	1100	900	400	700	500	700	800	1000	700	800	900
233	4	623.8	201.493	1525.33	1737.23	211.901	50.5949	161.306	400	400	420	450	460	500	520	600	700	900	1000	480	500	700	700	360	370	400	400	400	500	600	600	550	600	650	700	800	800	900	1000	980	300	400	500	500	700	800	400	500	600
234	4	738.44	161.873	1525.33	1642.78	117.45	0.324361	117.126	750	900	700	900	1000	800	500	550	900	899	1000	567	750	700	800	400	600	750	750	600	800	850	900	550	600	900	600	700	600	800	800	800	350	400	600	800	900	900	650	700	800
238	4	547.78	92.5858	1525.33	1691.75	166.417	141.294	25.1234	550	300	330	400	430	500	550	530	600	630	670	450	520	570	620	400	450	500	400	450	500	530	550	570	590	600	620	630	650	659	670	680	450	500	450	480	510	540	570	600	630
240	4	583.8	93.6099	1525.33	1642.83	117.497	93.2834	24.2141	600	300	260	230	400	500	550	550	600	600	650	600	650	650	650	600	600	600	600	600	600	600	600	600	600	600	600	600	650	600	600	600	600	700	600	600	700	600	600	600	600
241	4	482.68	92.5071	1525.33	1797.87	272.543	248.298	24.2454	750	750	750	375	188	400	600	400	400	350	700	420	450	475	500	475	476	475	475	475	475	475	475	475	475	475	475	475	475	475	475	475	475	475	475	475	475	475	475	475	475
253	4	712.64	111.914	1525.33	1574.67	49.3432	1.45541	47.8878	500	300	400	400	450	600	750	700	700	750	800	700	750	750	800	750	750	780	750	700	700	750	750	750	700	700	720	750	780	780	800	800	700	700	750	750	751	751	700	750	750
256	4	706	140.204	1525.33	1618.19	92.8576	2.7536	90.104	750	400	500	750	1000	1200	600	700	900	700	800	600	800	900	750	600	800	900	500	600	800	650	600	650	800	750	600	600	750	800	750	800	500	700	500	700	750	700	700	600	750
260	4	790.6	90.8556	1525.33	1583.36	58.0297	17.9572	40.0724	900	600	700	800	800	850	800	700	750	900	1000	750	800	800	800	800	800	800	750	900	800	900	850	900	800	800	800	800	800	800	800	800	500	600	600	800	800	850	750	800	850
267	4	643	201.78	1525.33	1731.92	206.587	34.4036	172.183	500	350	400	500	650	750	650	500	550	650	700	450	450	600	750	350	500	550	350	400	700	900	850	450	600	900	550	500	650	800	550	550	350	550	700	600	1000	550	600	500	1000
270	4	666	87.738	1525.33	1576.81	51.4766	18.9187	32.5579	650	500	600	600	600	800	600	500	600	600	650	600	600	600	650	600	650	700	650	700	650	700	800	600	650	650	650	700	750	800	700	700	500	550	600	650	700	750	600	650	700
283	4	597.8	140.543	1525.33	1674.9	149.57	77.0153	72.5552	500	400	450	500	530	550	580	550	570	560	600	500	550	560	600	380	400	500	550	470	480	550	570	570	590	600	620	670	660	680	690	700	300	360	400	550	600	670	700	800	880
287	4	710.5	188.201	1525.33	1691.75	166.42	1.82951	164.59	500	700	1000	1100	1250	800	500	700	900	800	660	512	640	800	800	400	600	400	600	500	600	800	1000	600	800	900	750	600	700	900	800	700	500	600	500	600	700	850	988	888	700
289	4	654	127.711	1525.33	1623.04	97.7147	26.454	71.2606	500	500	650	900	1000	950	800	550	600	600	700	600	650	650	700	500	550	550	550	550	550	600	600	550	600	600	600	750	700	900	700	800	550	600	500	500	600	600	700	600	900
300	4	724.92	77.7932	1525.33	1553.24	27.9072	0.132246	27.7749	728	600	728	728	728	800	728	600	800	800	800	728	800	728	600	600	800	800	728	600	850	728	500	728	728	1000	728	728	728	600	728	728	600	800	728	728	728	728	728	728	728
304	4	565	111.857	1525.33	1673.76	148.429	117.268	31.1614	600	250	50	350	425	435	440	440	450	470	500	570	585	590	591	590	590	590	590	590	590	591	592	592	593	593	594	595	596	598	600	625	610	611	609	610	615	618	620	625	630
316	4	616.02	182.861	1525.33	1694.84	169.511	57.9701	111.541	500	250	250	250	250	251	260	300	400	450	460	490	510	600	700	620	630	640	650	640	640	640	640	620	620	630	640	650	660	670	680	700	670	680	670	670	680	690	700	720	740
321	4	886.7	306.526	1525.33	2132.7	607.375	126.003	481.372	750	400	400	420	1000	372	500	620	750	820	1823	1000	1200	1250	1000	700	1320	820	913	700	1200	1400	800	799	1000	1200	720	698	720	1300	1000	720	1000	800	580	890	1300	1000	500	1200	800
333	4	789.8	259.548	1525.33	1871.16	345.826	17.4776	328.349	1300	500	800	1000	1300	1200	800	700	800	900	900	600	700	800	700	500	600	700	650	500	650	700	800	500	600	700	750	800	800	900	1000	990	400	600	450	500	600	700	800	900	100
334	4	567.4	108.906	1525.33	1679.17	153.84	114.073	39.7675	700	400	500	500	550	750	600	550	560	570	600	530	540	600	600	400	450	470	500	480	490	550	370	460	550	570	370	560	600	630	400	620	550	640	460	530	560	460	550	570	670
335	4	573.04	305.786	1525.33	1987.53	462.204	106.717	355.487	1000	350	300	250	50	2	300	350	400	500	600	550	500	450	400	350	370	400	450	470	470	470	470	500	550	600	650	800	900	1000	2000	900	900	1000	500	400	350	400	500	550	550
340	4	780	229.907	1525.33	1807.3	281.971	12.1409	269.83	1000	500	700	1100	1300	1200	1000	400	600	600	700	550	650	800	800	500	600	900	600	600	700	500	600	700	800	800	600	1000	1200	800	1000	900	500	800	600	700	800	900	700	800	800
343	4	869.32	228.756	1525.33	1901.37	376.041	98.8482	277.193	1256	510	623	750	899	934	750	750	790	820	830	649	710	760	820	449	1000	1300	900	530	807	869	980	747	753	811	990	1180	1310	1400	1337	1045	379	562	671	743	743	1040	936	1028	1174
344	4	794.2	280.939	1525.33	1939.75	414.421	20.1985	394.222	500	400	450	600	750	1000	400	400	550	760	600	450	550	700	700	500	750	350	900	750	600	1000	900	800	800	450	1200	800	900	1300	1500	1300	600	1200	500	750	900	1200	600	750	900
351	4	614.26	147.381	1525.33	1673.93	148.602	59.7022	88.8999	800	450	400	442	421	500	600	600	700	700	700	550	600	600	600	600	700	550	600	600	500	500	500	500	450	450	500	500	500	600	600	600	600	600	500	550	550	550	550	550	550
360	4	947.98	229.671	1525.33	2063.34	538.007	249.706	288.301	950	1000	1200	1300	1500	950	1200	800	900	1000	1200	700	900	1100	1200	500	900	1000	800	500	1000	1350	700	900	1200	600	1000	1000	600	1100	1200	700	850	1200	1100	600	1000	1000	800	1200	700
362	4	627.2	176.89	1525.33	1720.76	195.427	47.5175	147.91	600	600	600	600	600	600	600	570	600	600	600	550	600	600	600	500	600	600	570	500	550	600	600	600	600	600	600	600	600	570	600	600	300	400	550	600	600	600	600	600	600
365	4	585.2	211.788	1525.33	1787.48	262.147	91.5943	170.552	300	350	500	650	1000	600	750	500	500	700	650	450	550	600	600	350	350	350	500	400	350	550	600	550	400	700	650	500	750	1000	650	750	230	350	350	350	400	650	500	750	400
372	4	665.4	154.063	1525.33	1648.94	123.613	19.2669	104.346	900	500	600	700	700	750	600	600	600	600	600	550	550	550	500	450	470	500	550	500	500	600	700	600	650	700	750	800	900	1000	1000	1000	500	600	500	500	500	600	600	700	700
379	4	1015	303.424	1525.33	2429.04	903.712	435.941	467.771	900	600	800	1000	1200	900	700	600	900	1200	1200	600	1000	1200	900	600	900	1000	800	600	900	1100	1000	600	550	700	900	1000	1200	1100	1200	1000	600	1000	1000	1500	1300	1300	1000	2000	1200
380	4	538.6	173.087	1525.33	1782	256.669	154.874	101.795	1200	250	500	500	650	650	550	500	500	700	800	350	300	400	280	300	500	450	800	250	500	500	600	550	580	600	650	650	650	700	760	780	300	350	360	380	400	390	450	480	500
381	4	651	98.1929	1525.33	1591.59	66.2606	28.5243	37.7362	750	500	500	750	750	800	600	600	600	700	700	550	600	800	800	450	600	550	550	450	500	700	700	700	600	700	750	750	800	750	750	800	500	600	500	550	600	600	600	700	650
388	4	597.6	147.435	1525.33	1681.4	156.067	77.2379	78.8287	500	400	450	500	600	900	600	550	580	650	700	500	550	600	700	350	400	500	600	400	450	500	450	450	450	550	600	700	700	750	800	1000	300	350	500	600	700	700	750	700	600
392	4	831.6	188.033	1525.33	1754.71	229.38	51.6336	177.747	800	450	450	450	450	500	700	550	600	650	700	650	700	900	800	700	850	900	900	700	750	750	800	800	1000	1100	900	1100	950	900	950	1000	700	800	800	900	950	950	950	1200	1000
398	4	529.58	142.354	1525.33	1752.57	227.239	168.722	58.5165	700	400	475	550	600	750	600	450	500	560	560	490	539	580	650	350	350	380	430	550	635	700	700	500	535	540	550	625	680	750	750	650	200	250	350	400	500	650	750	750	500
400	4	696.1	215.84	1525.33	1728.09	202.765	5.43558	197.329	250	350	450	550	650	750	600	600	600	650	680	450	450	500	550	350	400	450	475	800	800	900	1000	800	600	700	850	900	1000	1000	1100	900	300	500	600	600	600	600	600	800	1000
411	4	504.86	92.5463	1525.33	1757.27	231.945	209.136	22.8094	600	335	330	308	288	550	750	550	600	600	590	600	600	550	650	370	420	430	430	450	500	620	580	520	520	480	520	530	480	500	550	580	350	550	480	450	430	430	520	550	532
423	4	504.88	147.152	1525.33	1799.7	274.368	209.101	65.2663	990	760	730	700	715	716	620	500	520	515	520	511	510	513	514	360	350	340	345	340	339	340	345	349	350	352	360	460	550	600	630	690	240	300	350	390	430	450	470	490	510
426	4	506.42	117.183	1525.33	1774.21	248.88	206.482	42.3981	1000	355	310	290	300	320	340	365	400	420	440	460	480	500	520	500	500	488	460	360	499	500	499	480	500	510	530	545	575	590	600	615	400	500	520	530	530	560	565	570	470
439	4	631.6	167.877	1525.33	1699.99	174.661	43.668	130.993	780	440	510	545	575	800	710	580	620	680	715	610	599	618	639	490	600	610	615	500	515	535	550	535	535	550	530	590	575	595	615	700	500	550	475	495	535	565	565	565	580
444	4	957	224.974	1525.33	2066.91	541.576	271.649	269.927	800	400	850	1100	1250	1000	800	500	1000	900	1200	900	900	1000	1000	800	450	1250	900	900	1000	800	900	850	800	850	900	900	1000	1250	1250	900	500	1100	850	850	1100	900	850	1100	1100
445	4	760	184.059	1525.33	1692.27	166.936	4.30111	162.635	500	400	500	500	600	500	550	600	700	1000	1100	500	700	800	1000	900	800	850	800	700	800	1000	1000	800	700	750	750	800	900	1000	1100	1000	500	600	500	600	700	800	600	700	800
447	4	569.4	56.6734	1525.33	1647.03	121.699	111.44	10.2587	500	450	500	550	600	650	610	500	500	550	600	500	550	575	600	400	500	550	575	550	550	550	575	560	575	580	600	610	630	640	650	660	500	550	500	500	550	560	570	580	600
451	4	387	118.24	1525.33	2009.69	484.356	444.246	40.1106	600	370	400	300	370	400	300	370	400	300	370	400	300	370	400	400	300	370	400	300	370	400	300	370	400	300	370	400	300	370	400	300	370	400	300	370	400	300	370	400	300
452	4	483.18	81.0487	1525.33	1789.07	263.735	247.386	16.3493	770	300	200	350	352	354	400	410	413	417	435	450	458	470	485	475	477	478	478	479	480	480	482	485	487	491	495	500	510	514	520	520	515	517	515	516	516	518	519	521	525
463	4	712	479.111	1525.33	2548.92	1023.59	1.56286	1022.03	1250	1000	1100	1300	1300	1250	1000	1000	1400	1400	1500	1200	1500	1400	1400	1100	1300	1500	1200	1100	500	500	700	500	500	500	500	500	500	500	500	500	400	400	300	300	200	200	200	200	200
466	4	721.6	101.3	1525.33	1569.42	44.0874	0.350713	43.7367	800	300	500	600	900	1000	950	600	650	700	800	710	715	720	730	700	750	760	710	600	650	700	800	600	700	710	715	720	730	750	750	750	700	750	700	720	730	750	710	720	730
151	1	1100	397.911	1525.33					1200	550	1150	1500
163	1	1029.27	277.478	1525.33					1100	475	900	1300	1275	1200	1010	750	1340	1330	1010	611	1000	935	750	1400	1450	1400	1000	1200	1250	875	500	800	1000	900
224	1	840.8	318.749	1525.33					1000	642	900	1242	420
254	1	608.289	152.228	1525.33					400	450	500	510	510	570	450	500	520	560	555	560	520	490	600	540	550	560	490	500	490	480	500	700	800	750	800	800	750	700	750	1200	700	700	500	700	720	740
255	1	1250	0	1525.33					1250	1250
412	1	1079.55	384.598	1525.33					1000	450	450	1700	1200	1000	1500	1600	1200	1000	1100	1000	1144	890	379	986	1869	692	466	898	1600	1600	1230	1000	1000	1300	900	1000	1600	856	856
119	2	1014.31	330.814	1525.33					1100	1100	1100	1400	1200	1294	1294	743	1126	1293	1063	532	1400	763	500	1054	1500	1622	500	1209	1003	1205	695	500	700	1300	500	926	1200	800	1300	536
162	2	806.233	220.212	1525.33					100	290	750	1000	1000	750	500	500	729	729	1100	1000	1000	1000	700	1000	1100	1200	800	1000	1000	670	700	780	780	1000	790	940	1100	780	750	800	600	800	700	1000	800	500	700	750	700
166	2	691.925	203.342	1525.33					940	10	500	740	900	650	450	430	880	740	1000	599	1000	599	698	344	777	789	467	789	789	807	807	680	777	900	400	658	1000	500	888	680	689	800	600	900	600	700	600	600
207	2	512.5	243.203	1525.33					750	250	250	750	750	750	400	300	250	750	700	250
226	2	805.556	356.82	1525.33					800	400	400	1000	1500	900	600	500	900	900	1000	500	1500	1000	800	350	350	1100
228	2	949.125	471.698	1525.33					1100	380	1000	2202	900	550	550	400	700	1800	940	400	1300	900	550	1600	1300	1500	700	500	800	1500	500	600	800	800	400	1300	800	600	1500	1500
232	2	700	407.08	1525.33					700	700	400	400	700	1000	1500	200
242	2	1065	238.106	1525.33					1200	900	1000	700	800	1300	1400	1300	1150	900
268	2	914	256.236	1525.33					850	480	800	900	1100	800	900	600	900	1400	900	400	1200	600	950	1200	1200	1100	1000	1000
272	2	5.37386e+07	3.39539e+08	1525.33					400	500	600	4000	2000	1000	200	500	900	1500	2000	800	6000	5000	10000	5000	1000	1000	1800	200	1000	1000	1000	1000	1000	1000	1000	1000	1000	1000	1000	1000000	1000000	2147483647	1000	1000	1000	1000	1000	1000
355	2	2396.86	1859.37	1525.33					3000	5778	5778	1986	1986	171	3312	5868	24	1524	1524	4392	2115	432	1377	1377	1458	567	2772	4896	1719	675
465	2	515.625	108.834	1525.33					250	500	500	500	1000	500	500	500	500	500	500	500	500	500	500	500	500	500	500	500	500	500	500	500	500	500	500	500	500	500	500	750
230	3	848.5	567.807	1525.33					1250	447
282	3			1525.33
356	3	794.714	339.115	1525.33					358	750	1050	1230	1100	630	445
385	3	532.917	102.913	1525.33					750	500	480	450	400	450	550	677	550	443	545	600
393	3	235.294	106.976	1525.33					400	100	300	300	100	100	100	100	100	100	100	100	200	200	100	200	300	300	300	300	400	400	300	300	300	300	300	300	300	300	300	400	100	200
397	3	626.19	113.599	1525.33					750	400	450	550	700	800	550	600	550	650	750	650	700	750	800	500	600	700	600	500	600
129	4	915.65	305.282	1525.33					990	666	666	540	578	990	800	740	750	765	768	765	765	765	765	1400	1400	1400	1400	1400
172	4	779.846	280.126	1525.33					750	680	1400	1260	1034	723	521	530	700	710	720	520	590
183	4	759.762	235.245	1525.33					358	666	700	700	800	632	548	780	820	900	512	990	1250	1100	379	838	1189	692	692	809	600
246	4	200		1525.33					200
250	4	837.442	302.801	1525.33					300	400	700	600	800	1100	900	400	700	900	900	900	1000	1400	1100	900	500	1700	1200	600	600	800	900	700	600	550	800	900	1300	970	1000	950	360	888	888	666	888	1600	400	800	850
317	4	583.822	80.0881	1525.33					750	732	451	662	504	622	534	600	550	588	588	616	538	597	552	702	474	645	516	651	512	616	538	597	552	586	561	579	566	576	568	574	823	383	713	465	651	511	617	537	597
389	3	1425.71	215.55	1525.33							1200			1200	1500			1250				1700			1680				1450
409	3			1525.33
111	1	943.74	250.262	1525.33					1000	750	770	1250	1030	750	790	650	850	1100	1000	600	1000	750	700	500	1000	1200	750	750	800	1000	700	1000	1540	804	957	1946	1100	1100	1200	800	1100	500	1100	1100	1200	700	850	850	850
148	2	811.7	311.402	1525.33					400	740	1550	1359	950	630	600	1000	1500	600	500	1600	1100	900	400	900	1100	700	500	900	1300	1000	600	650	650	650	650	650	650	650	650	650	650	650	650	650	650	650	650	650	650
213	2	956.08	344.815	1525.33					400	520	700	1300	1200	632	548	750	854	1300	1250	600	1200	800	379	740	1100	692	466	932	1320	879	561	649	950	804	957	1300	1023	1352	986	236	1179	442	1543	1205	1210	1210	1350	1100	800
364	4	925.24	307.68	1525.33					900	500	600	700	1000	900	550	1009	600	1347	1000	1706	600	840	1000	850	600	700	1000	800	500	850	560	650	1500	800	900	1500	1000	1000	1000	300	1000	500	1500	1000	1000	700	1000	1000	1000
271	1	1884.4	2737.39	1525.33					10	10	800	3000	13000	6000	800	600	1500	2000	1600	1000	2000	15000	1000	500	900	1000	500	500	500	1300	800	500	1000	2000	500	1200	2500	900	1500	500	100	2000	700	2000	1500	1300	700	1500	1200
427	1	5106340	2.82023e+07	1525.33					2500	3000	4500	3000	5000	6000	8000	10000	12000	14000	16000	18000	20000	25000	30000	35000	45000	50000	60000	70000	80000	100000	150000	200000	300000	400000	400000	400000	500000	500000	550000	600000	700000	800000	900000	1000000	1200000	1500000	1500000	2000000	2400000
261	2	1176.78	1552.58	1525.33					750	300	550	900	3000	850	1500	850	800	1800	1500	2500	1200	1400	400	1700	1500	1500	1400	1400	300	1150	700	450	600	1200	600	850	1890	900	900	800	800	900	300	999	1000	800	600	999	11200
173	4	1940	217.594	1525.33					1000	1000	1500	1500	2000	2000	2000	2000	2000	2000	2000	2000	2000	2000	2000	2000	2000	2000	2000	2000	2000	2000	2000	2000	2000	2000	2000	2000	2000	2000	2000	2000	2000	2000	2000	2000	2000	2000	2000	2000	2000
208	4	891.4	712.242	1525.33					100	500	2000	1700	5000	200	500	700	1000	1500	1500	500	700	600	500	700	700	700	600	700	900	700	900	700	600	735	590	500	500	900	900	900	500	700	500	395	600	650	700	700	700
[truncated: 59 more columns]
